# Supplementary material
Source: Research Square preprint supplement (doi:10.21203/rs.3.rs-8547288/v1)
Supplement: Supplementary file 1 [file c8fc9a0b671c513e405d11d8.xlsx]

## Sheet: Sheet1
		Q-PCR ANALYSIS
	GENE OF INTERSET	INTEREST	Treatment		Duplicates	ct
				R1	R2
	Control		12M	30.97	33.84	32.41
	(beta actin)		12C	33.19	33.24	33.33
			12A	32.13	31.85	31.99
			12MA	34.17	32.77	33.47
			0M	33.04	32.47	32.75
			0C	31.87	32.47	32.17
			0A	32.99	29.73	31.36
			0MA	31.93	30.82	31.38
			24M	36.09	32.52	34.31
			24C	34.08	31.7	32.89
			24A	31.28	30.63	30.96
			24MA	32.89	34.01	33.45
	Vitellogenin		12M	38.19	44.78	41.49
			12C	34.86	36.98	35.92
			12A	35.47	36.33	35.9
			12MA	40.03	36.8	38.42
			0M	39.08	34.93	37.01
			0C	44.75	44.59	44.67
			0A	37.4	38.28	37.84
			0MA	39.4	35.2	37.3
			24M	36.2	41.3	38.75
			24C	34.2	29.97	32.09
			24A	14.94	38.35	26.9
			24MA	44.13	37.85	40.99
	Deformed		12M	34.51	36.45	35.48
			12C	35.72	38.91	37.32
			12A	34.91	39.14	37.03
			12MA	37.23	38.79	38.01
			0M	33.93	41.12	37.53
			0C	43.73	41.49	42.61
			0A	35.99	44.82	40.41
			0MA	27.99	42.1	35.05
			24M	37.8	37.48	37.64
			24C	37.33	41.91	39.62
			24A	43.98	35.64	39.81
			24MA	40.07	41.18	40.63
	Labial		12M	35.34	35.78	35.56
			12C	35.24	36.09	35.67
			12A	31.95	36.1	34.03
			12MA	34.49	37.08	35.79
			0M	41.09	37.92	39.51
			0C	33.8	40.13	36.97
			0A	35.52	35.27	35.4
			0MA	35.93	37.19	36.56
			24M	34.86	35.63	35.25
			24C	33.7	37.63	35.67
			24A	39.45	34.33	36.89
			24MA	33.64	36.31	34.98
	Ultrabithorax		12M	36.01	42.19	39.1
			12C	37.52	40.03	38.78
			12A	42.2	36.91	39.56
			12MA	37.19	42.07	39.63
			0M	39.64	42.69	41.17
			0C	30.02	43.2	36.61
			0A	45.39	42.38	43.89
			0MA	38.42	38.48	38.45
			24M	22.47	41.74	32.11
			24C	38.39	41.19	39.79
			24A	38.6	40.93	39.77
			24MA	37.13	25.89	31.51
	Abdomen-A		12M	21.86	30.35	26.11
			12C	28.65	27.92	28.89
			12A	27.95	21.86	24.91
			12MA	28.84	17.74	23.29
			0M	29	44.6	36.8
			0C	42.71	17.77	30.24
			0A	19.83	37.05	28.44
			0MA	20.12	27.73	23.93
			24M	27.67	19.75	23.71
			24C	28.86	28.52	28.69
			24A	38.61	44.48	41.55
			24MA	40.99	16.82	28.91
	Abdomen-b		12M	40.07	39.06	39.57
			12C	38.94	36.49	37.72
			12A	41.12	40.19	40.66
			12MA	37.6	37.23	37.42
			0M	38.87	42.4	40.64
			0C	38.62	32.67	35.65
			0A	41.84	39.11	40.48
			0MA	40.81	43.96	42.39
			24M	38.73	41.2	39.97
			24C	37.33	38.92	38.13
			24A	35.62	35.58	35.6
			24MA	35.59	38.52	37.06
	aaNAT		12M	34.2	33.69	33.95
			12C	35.42	34.53	34.98
			12A	35.34	35.37	35.36
			12MA	34.39	34.7	34.55
			0M	35.58	37.18	36.38
			0C	34.02	35.08	34.55
			0A	34.07	35.08	34.58
			0MA	35.22	43.03	39.13
			24M	34.1	36.97	35.54
			24C	35.34	33.7	34.52
			24A	32.67	33.38	33.03
			24MA	35.83	35.64	35.74

## Sheet: Sheet2
		ct	control ct	delta ct
		32.41		32.41
		33.33		33.33
		31.99		31.99
		33.47		33.47
		32.75		32.75
		32.17		32.17
		31.36		31.36
		31.38		31.38
		34.31		34.31
		32.89		32.89
		30.96		30.96
		33.45		33.45
		41.49	32.41	9.08
		35.92	33.33	2.59
		35.9	31.99	3.91
		38.42	33.47	4.95
		37.01	32.75	4.26
		44.67	32.17	12.5
		37.84	31.36	6.48
		37.3	31.38	5.92
		38.75	34.31	4.44
		32.09	32.89	-0.8
		26.9	30.96	-4.06
		40.99	33.45	7.54
		35.48	32.41	3.07
		37.32	33.33	3.99
		37.03	31.99	5.04
		38.01	33.47	4.54
		37.53	32.75	4.78
		42.61	32.17	10.44
		40.41	31.36	9.05
		35.05	31.38	3.67
		37.64	34.31	3.33
		39.62	32.89	6.73
		39.81	30.96	8.85
		40.63	33.45	7.18
		35.56	32.41	3.15
		35.67	33.33	2.34
		34.03	31.99	2.04
		35.79	33.47	2.32
		39.51	32.75	6.76
		36.97	32.17	4.8
		35.4	31.36	4.04
		36.56	31.38	5.18
		35.25	34.31	0.94
		35.67	32.89	2.78
		36.89	30.96	5.93
		34.98	33.45	1.53
		39.1	32.41	6.69
		38.78	33.33	5.45
		39.56	31.99	7.57
		39.63	33.47	6.16
		41.17	32.75	8.42
		36.61	32.17	5.44
		43.89	31.36	12.53
		38.45	31.38	7.07
		32.11	34.31	-2.2
		39.79	32.89	6.9
		39.77	30.96	8.81
		31.51	33.45	-1.94
		26.11	32.41	-6.3
		28.89	33.33	-4.44
		24.91	31.99	-7.08
		23.29	33.47	10.18
		36.8	32.75	4.05
		30.24	32.17	-1.93
		28.44	31.36	-2.92
		23.93	31.38	-7.45
		23.71	34.31	-10.6
		28.69	32.89	-4.2
		41.55	30.96	10.59
		28.91	33.45	-4.54
		39.57	32.41	7.16
		37.72	33.33	4.39
		40.66	31.99	8.69
		37.42	33.47	3.95
		40.64	32.75	7.89
		35.65	32.17	3.48
		40.48	31.36	9.12
		42.39	31.38	11.01
		39.97	34.31	5.66
		38.13	32.89	5.24
		35.6	30.96	4.64
		37.06	33.45	3.61
		33.95	32.41	1.54
		34.98	33.33	1.65
		35.36	31.99	3.37
		34.55	33.47	1.08
		36.38	32.75	3.63
		34.55	32.17	2.38
		34.58	31.36	3.22
		39.13	31.38	7.75
		35.54	34.31	1.23
		34.52	32.89	1.63
		33.03	30.96	2.07
		35.74	33.45	2.29

## Sheet: Sheet3
			delta ct	Con ΔΔct	ΔΔct
			32.41	32.41
			33.33	33.33
			31.99	31.99
			33.47	33.47
			32.75	32.75
			32.17	32.17
			31.36	31.36
			31.38	31.38
			34.31	34.31
			32.89	32.89
			30.96	30.96
			33.45	33.45
			9.08	32.41	-23.33
			2.59	33.33	-30.74
			3.91	31.99	-28.08
			4.95	33.47	-28.52
			4.26	32.75	-28.49
			12.5	32.17	-19.67
			6.48	31.36	-24.88
			5.92	31.38	-25.46
			4.44	34.31	-29.87
			-0.8	32.89	-33.69
			-4.06	30.96	-35.02
			7.54	33.45	-25.91
			3.07	32.41	-29.34
			3.99	33.33	-32.34
			5.04	31.99	-26.95
			4.54	33.47	-28.93
			4.78	32.75	-27.97
			10.44	32.17	-21.73
			9.05	31.36	-22.31
			3.67	31.38	-27.71
			3.33	34.31	-30.98
			6.73	32.89	-26.16
			8.85	30.96	-22.11
			7.18	33.45	-26.27
			3.15	32.41	-29.26
			2.34	33.33	-30.99
			2.04	31.99	-29.95
			2.32	33.47	-31.15
			6.76	32.75	-25.99
			4.8	32.17	-27.37
			4.04	31.36	-27.32
			5.18	31.38	-26.2
			0.94	34.31	-33.37
			2.78	32.89	-30.11
			5.93	30.96	-25.03
			1.53	33.45	-31.92
			6.69	32.41	-25.72
			5.45	33.33	-27.88
			7.57	31.99	-24.42
			6.16	33.47	-27.31
			8.42	32.75	-24.33
			5.44	32.17	-26.73
			12.53	31.36	-18.83
			7.07	31.38	-24.31
			-2.2	34.31	-36.51
			6.9	32.89	-25.99
			8.81	30.96	-22.15
			-1.94	33.45	-35.39
			-6.3	32.41	-38.71
			-4.44	33.33	-37.77
			-7.08	31.99	-39.07
			10.18	33.47	-23.29
			4.05	32.75	-28.7
			-1.93	32.17	-34.1
			-2.92	31.36	-34.28
			-7.45	31.38	-38.83
			-10.6	34.31	-44.91
			-4.2	32.89	-37.09
			10.59	30.96	-20.37
			-4.54	33.45	-37.99
			7.16	32.41	-25.25
			4.39	33.33	-28.94
			8.69	31.99	-23.3
			3.95	33.47	-29.52
			7.89	32.75	-24.86
			3.48	32.17	-28.69
			9.12	31.36	-22.24
			11.01	31.38	-20.37
			5.66	34.31	-28.65
			5.24	32.89	-27.65
			4.64	30.96	-26.32
			3.61	33.45	-29.84
			1.54	32.41	-30.87
			1.65	33.33	-31.68
			3.37	31.99	-28.62
			1.08	33.47	-32.39
			3.63	32.75	-29.12
			2.38	32.17	-29.79
			3.22	31.36	-28.14
			7.75	31.38	-23.63
			1.23	34.31	-33.08
			1.63	32.89	-31.27
			2.07	30.96	-28.89
			2.29	33.45	-31.16

## Sheet: MEAN CT
		Q-PCR ANALYSIS
	GENE OF INTERSET	INTEREST	Treatment		Duplicates
				R1	R2	CT VALUE
	Control		12M	30.97	33.84	32.41
	(beta actin)		12C	33.19	33.24	33.33
			12A	32.13	31.85	31.99
			12MA	34.17	32.77	33.47
			0M	33.04	32.47	32.75
			0C	31.87	32.47	32.17
			0A	32.99	29.73	31.36
			0MA	31.93	30.82	31.38
			24M	36.09	32.52	34.31
			24C	34.08	31.7	32.89
			24A	31.28	30.63	30.96
			24MA	32.89	34.01	33.45
	Vitellogenin		12M	38.19	44.78	41.49
			12C	34.86	36.98	35.92
			12A	35.47	36.33	35.9
			12MA	40.03	36.8	38.42
			0M	39.08	34.93	37.01
			0C	44.75	44.59	44.67
			0A	37.4	38.28	37.84
			0MA	39.4	35.2	37.3
			24M	36.2	41.3	38.75
			24C	34.2	29.97	32.09
			24A	14.94	38.35	26.9
			24MA	44.13	37.85	40.99
	Deformed		12M	34.51	36.45	35.48
			12C	35.72	38.91	37.32
			12A	34.91	39.14	37.03
			12MA	37.23	38.79	38.01
			0M	33.93	41.12	37.53
			0C	43.73	41.49	42.61
			0A	35.99	44.82	40.41
			0MA	27.99	42.1	35.05
			24M	37.8	37.48	37.64
			24C	37.33	41.91	39.62
			24A	43.98	35.64	39.81
			24MA	40.07	41.18	40.63
	Labial		12M	35.34	35.78	35.56
			12C	35.24	36.09	35.67
			12A	31.95	36.1	34.03
			12MA	34.49	37.08	35.79
			0M	41.09	37.92	39.51
			0C	33.8	40.13	36.97
			0A	35.52	35.27	35.4
			0MA	35.93	37.19	36.56
			24M	34.86	35.63	35.25
			24C	33.7	37.63	35.67
			24A	39.45	34.33	36.89
			24MA	33.64	36.31	34.98
	Ultrabithorax		12M	36.01	42.19	39.1
			12C	37.52	40.03	38.78
			12A	42.2	36.91	39.56
			12MA	37.19	42.07	39.63
			0M	39.64	42.69	41.17
			0C	30.02	43.2	36.61
			0A	45.39	42.38	43.89
			0MA	38.42	38.48	38.45
			24M	22.47	41.74	32.11
			24C	38.39	41.19	39.79
			24A	38.6	40.93	39.77
			24MA	37.13	25.89	31.51
	Abdomen-A		12M	21.86	30.35	26.11
			12C	28.65	27.92	28.89
			12A	27.95	21.86	24.91
			12MA	28.84	17.74	23.29
			0M	29	44.6	36.8
			0C	42.71	17.77	30.24
			0A	19.83	37.05	28.44
			0MA	20.12	27.73	23.93
			24M	27.67	19.75	23.71
			24C	28.86	28.52	28.69
			24A	38.61	44.48	41.55
			24MA	40.99	16.82	28.91
	Abdomen-b		12M	40.07	39.06	39.57
			12C	38.94	36.49	37.72
			12A	41.12	40.19	40.66
			12MA	37.6	37.23	37.42
			0M	38.87	42.4	40.64
			0C	38.62	32.67	35.65
			0A	41.84	39.11	40.48
			0MA	40.81	43.96	42.39
			24M	38.73	41.2	39.97
			24C	37.33	38.92	38.13
			24A	35.62	35.58	35.6
			24MA	35.59	38.52	37.06
	aaNAT		12M	34.2	33.69	33.95
			12C	35.42	34.53	34.98
			12A	35.34	35.37	35.36
			12MA	34.39	34.7	34.55
			0M	35.58	37.18	36.38
			0C	34.02	35.08	34.55
			0A	34.07	35.08	34.58
			0MA	35.22	43.03	39.13
			24M	34.1	36.97	35.54
			24C	35.34	33.7	34.52
			24A	32.67	33.38	33.03
			24MA	35.83	35.64	35.74

## Sheet: FINAL
					Q-PCR ANALYSIS
				GENE OF INTERSET	INTEREST	Treatment		Duplicates	ct	control ct	delta ct	control Delta ct		ΔΔct	Fold change over
							R1	R2
				Control		12M	30.97	33.84	32.41		32.41
				(beta actin)		12C	33.19	33.24	33.33	33.33	33.33
						12A	32.13	31.85	31.99		31.99
						12MA	34.17	32.77	33.47		33.47
						0M	33.04	32.47	32.75		32.75
						0C	31.87	32.47	32.17	32.17	32.17
						0A	32.99	29.73	31.36		31.36
						0MA	31.93	30.82	31.38		31.38
						24M	36.09	32.52	34.31		34.31
						24C	34.08	31.7	32.89	32.89	32.89
						24A	31.28	30.63	30.96		30.96
						24MA	32.89	34.01	33.45		33.45
				Vitellogenin		12M	38.19	44.78	41.49	32.41	9.08		-23.33	6.49	89.8845
						12C	34.86	36.98	35.92	33.33	2.59		-30.74		1
						12A	35.47	36.33	35.9	31.99	3.91		-28.08	1.32	2.49666
						12MA	40.03	36.8	38.42	33.47	4.95		-28.52	2.36	5.1337
															1
						0M	39.08	34.93	37.01	32.75	4.26		-28.49	-8.24	0.0033076
						0C	44.75	44.59	44.67	32.17	12.5		-19.67		1
						0A	37.4	38.28	37.84	31.36	6.48		-24.88	-6.02	0.0154099
						0MA	39.4	35.2	37.3	31.38	5.92		-25.46	-6.58	0.0104526
															1
						24M	36.2	41.3	38.75	34.31	4.44		-29.87	3.64	12.4666
						24C	34.2	29.97	32.09	32.89	-0.8		-33.69		1
						24A	14.94	38.35	26.9	30.96	-4.06		-35.02	3.26	9.57983
						24MA	44.13	37.85	40.99	33.45	7.54		-25.91	6.74	106.891
															1
				Deformed		12M	34.51	36.45	35.48	32.41	3.07		-29.34	-0.92	0.528509
						12C	35.72	38.91	37.32	33.33	3.99		-32.34		1
						12A	34.91	39.14	37.03	31.99	5.04		-26.95	1.05	2.07053
						12MA	37.23	38.79	38.01	33.47	4.54		-28.93	0.55	1.46409
															1
						0M	33.93	41.12	37.53	32.75	4.78		-27.97	-5.66	0.0197774
						0C	43.73	41.49	42.61	32.17	10.44		-21.73		1
						0A	35.99	44.82	40.41	31.36	9.05		-22.31	-1.39	0.381565
						0MA	27.99	42.1	35.05	31.38	3.67		-27.71	-6.77	0.00916277
															1
						24M	37.8	37.48	37.64	34.31	3.33		-30.98	-3.4	0.0947323
						24C	37.33	41.91	39.62	32.89	6.73		-26.16		1
						24A	43.98	35.64	39.81	30.96	8.85		-22.11	2.12	4.34694
						24MA	40.07	41.18	40.63	33.45	7.18		-26.27	0.45	1.36604
															1
				Labial		12M	35.34	35.78	35.56	32.41	3.15		-29.26	0.81	1.75321
						12C	35.24	36.09	35.67	33.33	2.34		-30.99		1
						12A	31.95	36.1	34.03	31.99	2.04		-29.95	-0.3	0.812252
						12MA	34.49	37.08	35.79	33.47	2.32		-31.15	-0.02	0.986233
															1
						0M	41.09	37.92	39.51	32.75	6.76		-25.99	1.96	3.89062
						0C	33.8	40.13	36.97	32.17	4.8		-27.37		1
						0A	35.52	35.27	35.4	31.36	4.04		-27.32	-0.76	0.590496
						0MA	35.93	37.19	36.56	31.38	5.18		-26.2	0.38	1.30134
															1
						24M	34.86	35.63	35.25	34.31	0.94		-33.37	-1.84	0.279322
						24C	33.7	37.63	35.67	32.89	2.78		-30.11		1
						24A	39.45	34.33	36.89	30.96	5.93		-25.03	3.15	8.87656
						24MA	33.64	36.31	34.98	33.45	1.53		-31.92	-1.25	0.420448
															1
				Ultrabithorax		12M	36.01	42.19	39.1	32.41	6.69		-25.72	1.24	2.36199
						12C	37.52	40.03	38.78	33.33	5.45		-27.88		1
						12A	42.2	36.91	39.56	31.99	7.57		-24.42	2.12	4.34694
						12MA	37.19	42.07	39.63	33.47	6.16		-27.31	0.71	1.6358
															1
						0M	39.64	42.69	41.17	32.75	8.42		-24.33	2.98	7.88986
						0C	30.02	43.2	36.61	32.17	5.44		-26.73		1
						0A	45.39	42.38	43.89	31.36	12.53		-18.83	7.09	136.239
						0MA	38.42	38.48	38.45	31.38	7.07		-24.31	1.63	3.09513
															1
						24M	22.47	41.74	32.11	34.31	-2.2		-36.51	-4.7	0.0384733
						24C	38.39	41.19	39.79	32.89	6.9		-25.99		1
						24A	38.6	40.93	39.77	30.96	8.81		-22.15	1.91	3.75809
						24MA	37.13	25.89	31.51	33.45	-1.94		-35.39	-4.96	0.0321286
															1
															1
				Abdomen-A		12M	21.86	30.35	26.11	32.41	-6.3		-38.71	1.86	3.63008
						12C	28.65	27.92	28.89	33.33	-4.44		-37.77		1
						12A	27.95	21.86	24.91	31.99	-7.08		-39.07	2.64	6.23332
						12MA	28.84	17.74	23.29	33.47	10.18		-23.29	5.74	53.4456
															1
						0M	29	44.6	36.8	32.75	4.05		-28.7	2.12	4.34694
						0C	42.71	17.77	30.24	32.17	-1.93		-34.1		1
						0A	19.83	37.05	28.44	31.36	-2.92		-34.28	0.99	1.98618
						0MA	20.12	27.73	23.93	31.38	-7.45		-38.83	5.52	45.8866
															1
						24M	27.67	19.75	23.71	34.31	-10.6		-44.91	6.4	84.4485
						24C	28.86	28.52	28.69	32.89	-4.2		-37.09		1
						24A	38.61	44.48	41.55	30.96	10.59		-20.37	6.39	83.8652
						24MA	40.99	16.82	28.91	33.45	-4.54		-37.99	0.34	1.26576
															1
															1
				Abdomen-b		12M	40.07	39.06	39.57	32.41	7.16		-25.25	2.77	6.82108
						12C	38.94	36.49	37.72	33.33	4.39		-28.94		1
						12A	41.12	40.19	40.66	31.99	8.69		-23.3	4.3	19.6983
						12MA	37.6	37.23	37.42	33.47	3.95		-29.52	-0.44	0.737135
															1
						0M	38.87	42.4	40.64	32.75	7.89		-24.86	4.41	21.259
						0C	38.62	32.67	35.65	32.17	3.48		-28.69		1
						0A	41.84	39.11	40.48	31.36	9.12		-22.24	5.64	49.8665
						0MA	40.81	43.96	42.39	31.38	11.01		-20.37	7.53	184.823
															1
						24M	38.73	41.2	39.97	34.31	5.66		-28.65	0.42	1.33793
						24C	37.33	38.92	38.13	32.89	5.24		-27.65		1
						24A	35.62	35.58	35.6	30.96	4.64		-26.32	-0.6	0.659754
						24MA	35.59	38.52	37.06	33.45	3.61		-29.84	-1.63	0.323088
															1
															1
				aaNAT		12M	34.2	33.69	33.95	32.41	1.54		-30.87	-0.11	0.926588
						12C	35.42	34.53	34.98	33.33	1.65		-31.68		1
						12A	35.34	35.37	35.36	31.99	3.37		-28.62	1.72	3.29436
						12MA	34.39	34.7	34.55	33.47	1.08		-32.39	-0.57	0.673617
															1
						0M	35.58	37.18	36.38	32.75	3.63		-29.12	1.25	2.37841
						0C	34.02	35.08	34.55	32.17	2.38		-29.79		1
						0A	34.07	35.08	34.58	31.36	3.22		-28.14	0.84	1.79005
						0MA	35.22	43.03	39.13	31.38	7.75		-23.63	5.37	41.3553
															1
						24M	34.1	36.97	35.54	34.31	1.23		-33.08	-0.4	0.757858
						24C	35.34	33.7	34.52	32.89	1.63		-31.27		1
						24A	32.67	33.38	33.03	30.96	2.07		-28.89	0.44	1.3566
						24MA	35.83	35.64	35.74	33.45	2.29		-31.16	0.66	1.58008

## Sheet: Graph
		Q-PCR ANALYSIS
	GENE OF INTERSET	INTEREST	Treatment	Fold change
Vitellogenin		12L:12D	MEL	89.8845
			CONTROL	1
			ABA	2.49666
			MEL+ABA	5.1337
		0L:24D	MEL	0.0033076
			CONTROL	1
			ABA	0.0154099
			MEL+ABA	0.0104526
		24L:0D	MEL	12.4666
			CONTROL	1
			ABA	9.57983
			MEL+ABA	106.891
Deformed		12L:12D	MEL	0.528509
			CONTROL	1
			ABA	2.07053
			MEL+ABA	1.46409
		0L:24D	MEL	0.0197774
			CONTROL	1
			ABA	0.381565
			MEL+ABA	0.00916277
		24L:0D	MEL	0.0947323
			CONTROL	1
			ABA	4.34694
			MEL+ABA	1.36604
Labial		12L:12D	MEL	1.75321
			CONTROL	1
			ABA	0.812252
			MEL+ABA	0.986233
		0L:24D	MEL	3.89062
			CONTROL	1
			ABA	0.590496
			MEL+ABA	1.30134
		24L:0D	MEL	0.279322
			CONTROL	1
			ABA	8.87656
			MEL+ABA	0.420448
Ultrabithorax		12L:12D	MEL	2.36199
			CONTROL	1
			ABA	4.34694
			MEL+ABA	1.6358
		0L:24D	MEL	7.88986
			CONTROL	1
			ABA	136.239
			MEL+ABA	3.09513
		24L:0D	MEL	0.0384733
			CONTROL	1
			ABA	3.75809
			MEL+ABA	0.0321286
Abdomen-A		12L:12D	MEL	3.63008
			CONTROL	1
			ABA	6.23332
			MEL+ABA	53.4456
		0L:24D	MEL	4.34694
			CONTROL	1
			ABA	1.98618
			MEL+ABA	45.8866
		24L:0D	MEL	84.4485
			CONTROL	1
			ABA	83.8652
			MEL+ABA	1.26576
Abdomen-b		12L:12D	MEL	6.82108
			CONTROL	1
			ABA	19.6983
			MEL+ABA	0.737135
		0L:24D	MEL	21.259
			CONTROL	1
			ABA	49.8665
			MEL+ABA	184.823
		24L:0D	MEL	1.33793
			CONTROL	1
			ABA	0.659754
			MEL+ABA	0.323088
aaNAT		12L:12D	MEL	0.926588
			CONTROL	1
			ABA	3.29436
			MEL+ABA	0.673617
		0L:24D	MEL	2.37841
			CONTROL	1
			ABA	1.79005
			MEL+ABA	41.3553
		24L:0D	MEL	0.757858
			CONTROL	1
			ABA	1.3566
			MEL+ABA	1.58008
